# Supplementary material
Source: MDPI journal article supplement (https://www.mdpi.com/2073-4344/5/3/1399)
Supplement: s1 [file s1]

## Supplementary Information

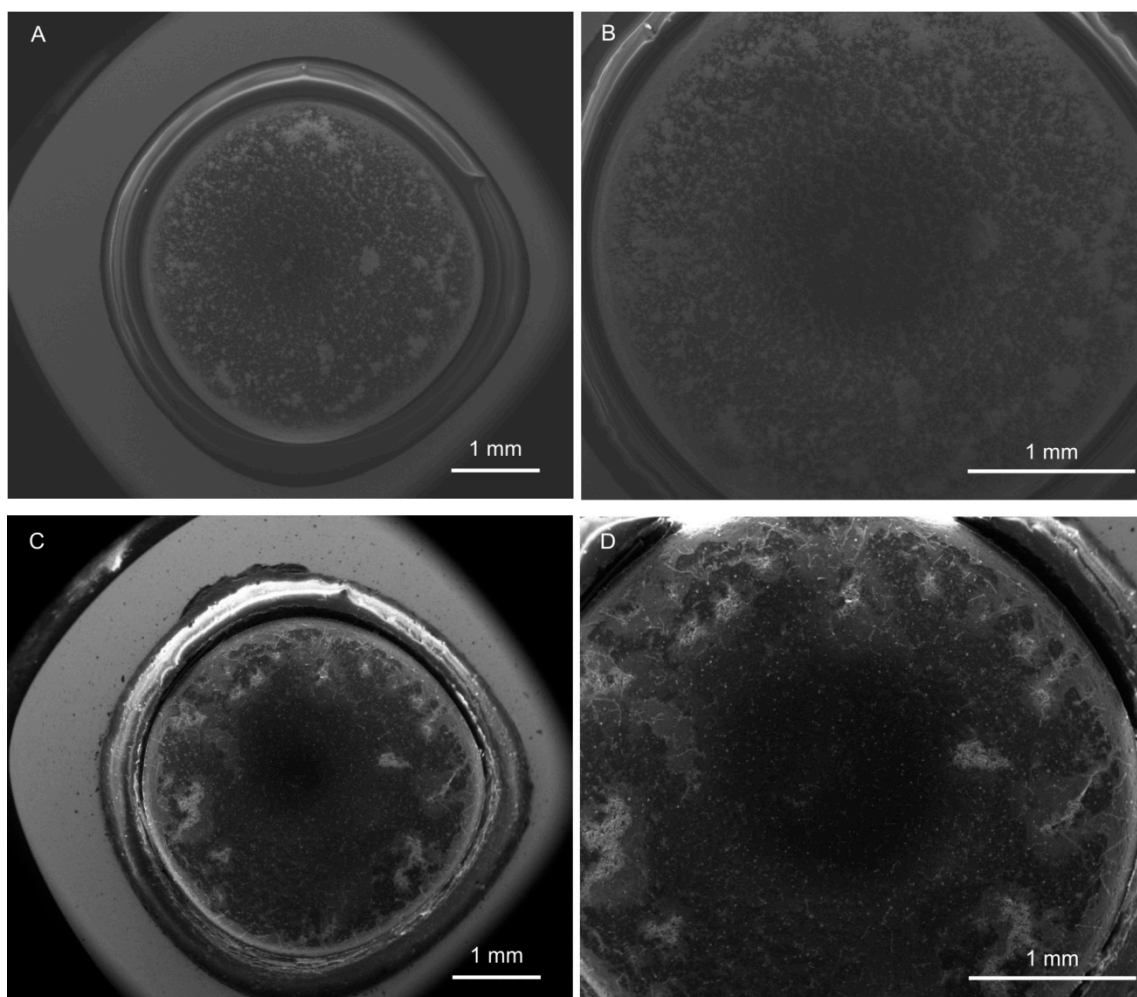

**Figure S1.** SEM micrographs at different magnifications of  $\text{Mn}_x\text{O}_{1+x}$  films on RDE before (A,B) and after (C,D) ADT cycling (5000 cycles at  $50 \text{ mV}\cdot\text{s}^{-1}$  between 0.4 and 0.8 V vs. Ag/AgCl, in a 0.5 M  $\text{H}_2\text{SO}_4$  solution).
